# Supplementary material
Source: ML conference proceedings conference paper supplement (https://openaccess.thecvf.com/content/CVPR2022/html/Guo_CO-SNE_Dimensionality_Reduction_CVPR_2022_paper.html)
Supplement: Supplementary file 1 [file Guo_CO-SNE_Dimensionality_Reduction_CVPR_2022_supplemental.pdf]

# Supplementary for CO-SNE: Dimensionality Reduction and Visualization for Hyperbolic Data

Yunhui Guo

Haoran Guo  
UC Berkeley / ICSI

Stella X. Yu

## 1. Riemannian Geometry

We give a brief overview of Riemannian geometry, for more details please refer to [1]. A Riemannian manifold  $(\mathcal{M}, \mathfrak{g})$  is a real smooth manifold  $\mathcal{M}$  with a Riemannian metric  $\mathfrak{g}$ . The Riemannian metric  $\mathfrak{g}$  is a smoothly varying inner product which is defined on the tangent space  $T_{\mathbf{x}}\mathcal{M}$  of  $\mathcal{M}$ . Given  $\mathbf{x} \in \mathcal{M}$  and two vectors  $\mathbf{v}, \mathbf{w} \in T_{\mathbf{x}}\mathcal{M}$ , we can use the Riemannian metric  $\mathfrak{g}$  to compute the inner product  $\langle \mathbf{v}, \mathbf{w} \rangle_{\mathbf{x}}$  as  $\mathfrak{g}(\mathbf{v}, \mathbf{w})$ . The norm of  $\mathbf{v} \in T_{\mathbf{x}}\mathcal{M}$  is defined as  $\|\mathbf{v}\|_{\mathbf{x}} = \sqrt{\langle \mathbf{v}, \mathbf{v} \rangle_{\mathbf{x}}}$ . A geodesic generalizes the notion of straight line in the manifold which is defined as a curve  $\gamma : [0, 1] \rightarrow \mathcal{M}$  of constant speed that is everywhere locally a distance minimizer. The exponential map and the inverse exponential map are defined as follows: given  $\mathbf{x}, \mathbf{y} \in \mathcal{M}$ ,  $\mathbf{v} \in T_{\mathbf{x}}\mathcal{M}$ , and a geodesic  $\gamma$  of length  $\|\mathbf{v}\|$  such that  $\gamma(0) = \mathbf{x}, \gamma(1) = \mathbf{y}, \gamma'(0) = \mathbf{v}/\|\mathbf{v}\|$ , the exponential map  $\text{Exp}_{\mathbf{x}} : T_{\mathbf{x}}\mathcal{M} \rightarrow \mathcal{M}$  satisfies  $\text{Exp}_{\mathbf{x}}(\mathbf{v}) = \mathbf{y}$  and the inverse exponential map  $\text{Exp}_{\mathbf{x}}^{-1} : \mathcal{M} \rightarrow T_{\mathbf{x}}\mathcal{M}$  satisfies  $\text{Exp}_{\mathbf{x}}^{-1}(\mathbf{y}) = \mathbf{v}$ .

## 2. Hyperbolic Student's t-Distribution

Recall the way to define the the Student's t-distribution which expresses the random variable  $t$  as,

$$t = \frac{u}{\sqrt{v/n}} \quad (1)$$

where  $u$  is a random variable sampled from a standard normal distribution and  $v$  is a random variable sampled from a  $\chi^2$ -distribution of  $n$  degrees of freedom. The  $\chi^2$ -distribution can also be derived from normal distribution. Let  $u_1, u_2, \dots, u_n$  be independent standard normal random variables, then the sum of the squares,

$$v = \sum_{i=1}^n u_i^2 \quad (2)$$

is a  $\chi^2$ -distribution with  $n$  degrees of freedom. Thus, the probability density function of the  $\chi^2$ -distribution can be derived from the probability density function of the normal distribution which is,

$$T_n(v) = \frac{1}{2^{n/2}\Gamma(n/2)} v^{(n-2)/2} e^{-v/2} \quad (3)$$

Using Equation 1, we can further derive the probability density function of the Student's t-distribution,

$$f_n(t) = \frac{1}{\sqrt{n}B(1/2, n/2)} \left(1 + \frac{t^2}{n}\right)^{-(n+1)/2} \quad (4)$$

where  $B$  is the Beta function.

The probability density function of hyperbolic Cauchy distribution can be derived in a similar way using hyperbolic normal distribution.

## 3. Hyperbolic Cauchy Distribution

Similar to the Student's t-Distribution, the probability density function of Cauchy distribution can derived from the probability density function of the normal distribution. In particular, let  $X$  and  $Y$  be independent standard normal random variables, then  $Z = \frac{X}{X+Y}$  is a Cauchy random variable. The probability density function of Cauchy distribution can be written as,

$$f(x; x_0, \gamma) = \frac{1}{\pi\gamma[1 + (\frac{x-x_0}{\gamma})^2]} \quad (5)$$

The probability density function of hyperbolic Cauchy distribution can be derived in a similar way using hyperbolic normal distribution.

The repulsion and attraction forces in CO-SNE depend on the term  $p_{ij} - q_{ij}$  in Equation 12 of the main text.  $p_{ij}$  is fixed during training which depends on the distribution of the high-dimensional datapoints. To create more repulsion forces between two close low-dimensional embeddings  $y_i$  and  $y_j$ , we aim at increasing the probability that the point  $y_i$  would select the point  $y_j$  as its neighbor (i.e.,  $q_{ij}$ ). By using a small  $\gamma$  in hyperbolic Cauchy distribution, the distance between  $y_i$  and  $y_j$  is scaled up. When the point  $y_i$  is fixed, the probability of selecting  $y_j$  as a neighbor (i.e.,  $q_{ij}$ ) is scaled up relatively to some point  $y_k$  which is far away

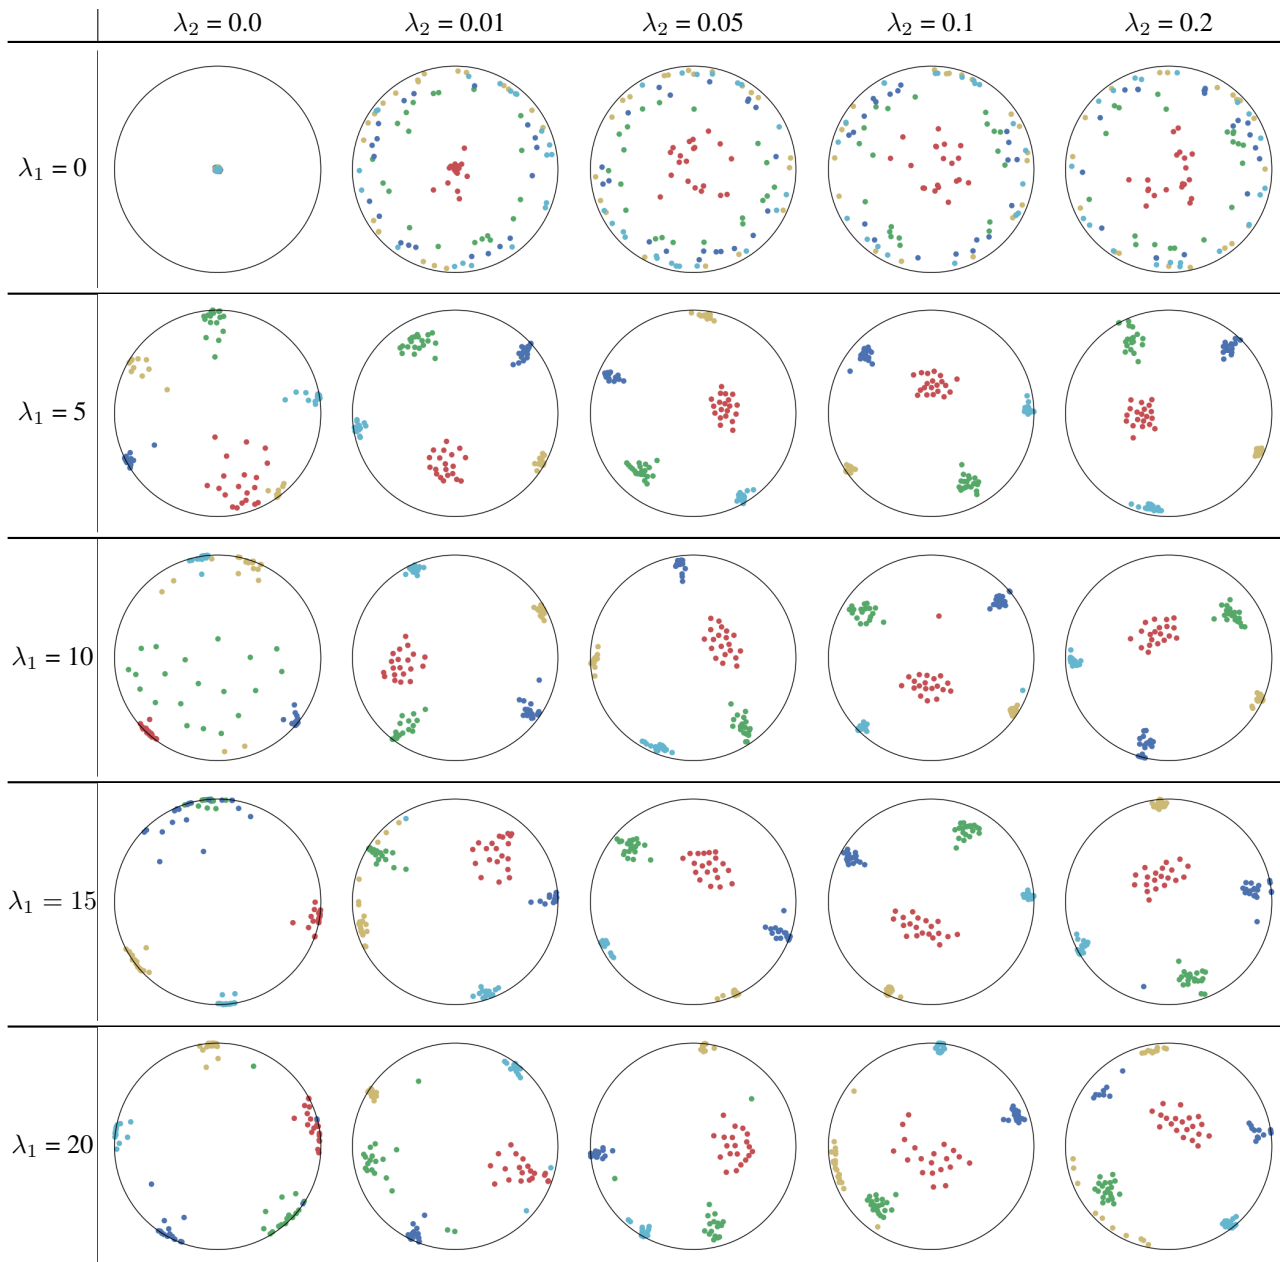

Figure 1. The effect of  $\lambda_1$  and  $\lambda_2$  on the quality of the visualization. We show the visualization results of CO-SNE on a mixture of five hyperbolic normal distributions in a five-dimensional hyperbolic space. We can observe that  $\lambda_1$  is responsible for preserving the local similarity structure and  $\lambda_2$  is responsible for preserving the global hierarchical structure. *This shows that both the KL-divergence and the distance loss are important for producing good visualization.* CO-SNE is robust to wide choices of  $\lambda_1$  and  $\lambda_2$ . Generally,  $\lambda_1$  should be larger than  $\lambda_2$  since the magnitude of the gradients of the KL-divergence is smaller.

from  $y_i$ . As a result,  $p_{ij} - q_{ij}$  can potentially become negative. This creates additional repulsion forces to push the low-dimensional points apart.

#### 4. The Effect of $\lambda_1$ and $\lambda_2$

Recall the objective function of CO-SNE,

$$\mathcal{L} = \lambda_1 \mathcal{C} + \lambda_2 \mathcal{H} \quad (6)$$

$\lambda_1$  and  $\lambda_2$  are used to balance the KL-divergence  $\mathcal{C}$  and the distance loss  $\mathcal{H}$  and can be regarded as the learning rates.

For ablation studies on the effect of  $\lambda_1$  and  $\lambda_2$ , we reuse the settings in Section 4.1 of the main text.

We consider different settings of  $\lambda_1$  and  $\lambda_2$  to investigate the effect of the KL-divergence and the distance loss. The results are shown in Figure 1. We have several observations from the results.

1. In the first row,  $\lambda_1 = 0.0$ . This means that only the distance loss is presented. We can observe that the low-dimensional embeddings can only approximate the magnitude of the high-dimensional datapoints but not the similarity structure.
2. In the first column,  $\lambda_2 = 0.0$ . This means that only the KL-divergence is presented. We can observe that the low-dimensional embeddings can only preserve the similarity structure in the high-dimensional datapoints but not the hierarchical information.
3. In other cases, we can observe that a larger  $\lambda_2$  can better preserve the hierarchical structure in the high-dimensional datapoints but may distort the similarity structure. A larger  $\lambda_1$  may also lead to a bad visualization of the similarity structure since the KL-divergence might diverge. Nevertheless, CO-SNE is robust to wide choices of  $\lambda_1$  and  $\lambda_2$ . *Both the KL-divergence and the distance loss are important for producing good visualization.*

## References

- [1] Manfredo Perdigao do Carmo. *Riemannian geometry*. Birkhäuser, 1992. 1
